# Supplementary material for: Characterization of a Novel Family IV Esterase Containing a Predicted CzcO Domain and a Family V Esterase with Broad Substrate Specificity from an Oil-Polluted Mud Flat Metagenomic Library
Source: MDPI journal article supplement (doi:10.3390/app11135905), 2021-06-25
Supplement: s1 [file s1]

## Supplementary Materials

# Characterization of a Novel Family IV Esterase Containing a Predicted CzcO Domain and a Family V Esterase with Broad Substrate-Specificity from the Oil-Polluted Mud Flat Metagenomic Library

Jong Eun Park<sup>1</sup>, Geum Seok Jeong<sup>1</sup>, Hyun Woo Lee<sup>1</sup>, Sung Kyum Kim<sup>2</sup>, Junggho Kim<sup>2</sup>, Hoon Kim<sup>1,2,\*</sup>

<sup>1</sup> Department of Pharmacy, and Research Institute of Life Pharmaceutical Sciences, Suncheon National University, Suncheon 57922, Republic of Korea; park140201@naver.com (J.E.P); fever41@naver.com (G.S.J); hyun\_325@naver.com (H.W.L)

<sup>2</sup> Department of Agricultural Chemistry, Suncheon National University, Suncheon 57922, Republic of Korea; rlatjdrua1234@nate.com (S.K.K); junggho@scnu.ac.kr (J.K)

\* Correspondence: hoon@suncheon.ac.kr; Tel.: +82617503751

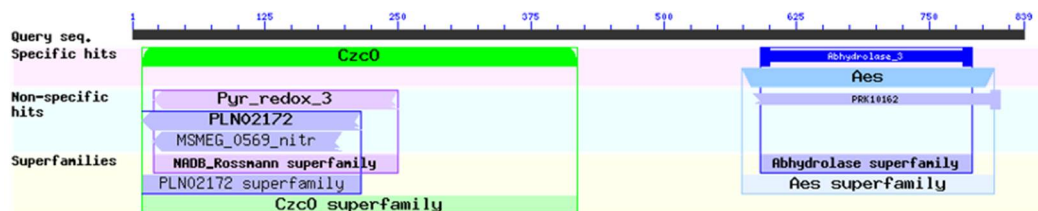

(a)

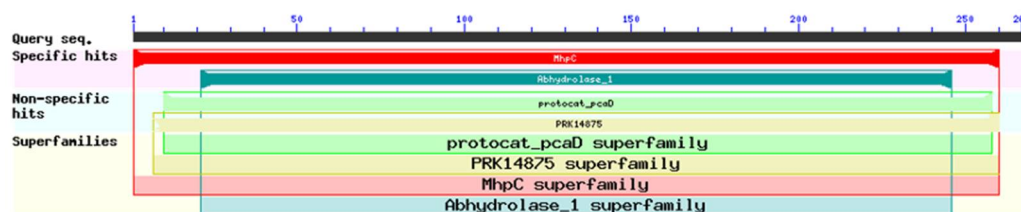

(b)

**Figure S1.** BLASTp of Est2L (a) and Est4L (b). Est2L was matched to two domains of a CzcO superfamily domain (10-419 amino acid residues) and an acylesterase superfamily (573-811 amino acid residues).

|                   |                                          |     |                   |                                           |     |
|-------------------|------------------------------------------|-----|-------------------|-------------------------------------------|-----|
| Est2L Czco domain | THFTIDSATFLPAIIICGCGCGMAIIRHRAQVHR...F   | 44  | Est2L Czco domain | EEKRLIRCFWPMKIIFPAHYLHFESFALGFTRLGLTHW    | 269 |
| O07085            | .....MYCTIVICAGACISIGYMRKSECK...F        | 27  | O07085            | .....LVYFFIMIG.....KFSIFFW                | 208 |
| NP_244544         | .....MESIKWVINGGAGIAGMGYIVKKEVE...F      | 29  | NP_244544         | .....FFFLFLKIL.....NKSMFSW                | 211 |
| NP_355926         | EAAEIGYAEQFYVINGGCGGIALGAFIRKLGVE...T    | 196 | NP_355926         | GMTTRKALLIRASLYRIMHEEFVFYIRIRREQLAEFYPA   | 433 |
| NP_390541         | .....MYCTIVICAGACISIGYMRKSECK...F        | 27  | NP_390541         | .....LVYFFIMIG.....KFSIFFW                | 208 |
| NP_601977         | .....MSTINYEAIICAGACIAPAAFIISRFGEFGKLE   | 34  | NP_601977         | .....ETCFEEIAGWGIAVEFAVRENTENGAFAS        | 236 |
| Consensus         | y iigagcagla gyl q gv f                  |     | Consensus         | f pl ig s f w                             |     |
| Est2L Czco domain | IIIEFGGCVGGVWRINSYF(PACLVSESHLYSESEFNFW  | 84  | Est2L Czco domain | VVGGPFKKLIHTSV...FEIRRCMTFYIFGCHRIIS      | 306 |
| O07085            | IIIEKSHVEGESMKIR.YLSIVIFTSFMYSSIECMHLEGE | 66  | O07085            | FKRLGVLIHASTSIVG...RFICRKGFEVFGHEIRFAIRQ  | 245 |
| NP_244544         | MIILANECVGSWRNR.YLSIVIFTSFYSCIEGFMIDGA   | 68  | NP_244544         | LEWGGIYAGIITTRG...RWFRRKCFIFGKELKSLIK     | 248 |
| NP_355926         | IIIEFNREFGDSMRK.YKSLCIHFEVWYHLEFYIFFEN   | 235 | NP_355926         | LERAGFMILFGIESGLMKRYLRGSGYIIVGACILVID     | 473 |
| NP_390541         | IIIEKSHVEGESMKIR.YLSIVIFTSFMYSSIECMHLEGE | 66  | NP_390541         | FKRLGVLIHASTSIVG...RFICRKGFEVFGHEIRFAIRQ  | 245 |
| NP_601977         | IVILSNLGHGCAFRHR.WLSITIGFAEGIALIGLIMNRP  | 73  | NP_601977         | VVRTTGIFCIHFIYLAG.VIRGLIVSRGMFEIITFTGVVFG | 275 |
| Consensus         | iildkn vg swdr ydvlvlftpr ysslpq p g     |     | Consensus         | k g l a hds g k l k dp fg elk ik          |     |
| Est2L Czco domain | SRVFAFQAEIHGYIHCACALVELKHFIFEGAEVFAEFET  | 124 | Est2L Czco domain | NCYKTFQCFHVHLLTRIRKTIHETGIIETLGEFFAVIAI   | 346 |
| O07085            | KHGEISKNEIVAYKKYVKHFEIF..ICLPTEVISVLKIK  | 104 | O07085            | KEIILRK.....RVIPAKNEIIFKESSTIEVNNI        | 275 |
| NP_244544         | FNGEITIKENASYICCYANFNLE..MRHHTKIVIRVIRKQ | 106 | NP_244544         | GCIIHLKF.....RVMNVCGKEVEFAIHSRISFIRI      | 278 |
| NP_355926         | WEVETIKKVKGLKEMVIRAMEIN..YWGSTTCFSAQYCE  | 273 | NP_355926         | GSIKLRSG.....VLVSHITENAVVIKGTETIAIV       | 505 |
| NP_390541         | KHGEISKNEIVAYKKYVKHFEIF..ICLPTEVISVLKIK  | 104 | NP_390541         | KEIILRK.....RVIPAKNEIIFKESSTIEVNNI        | 275 |
| NP_601977         | LEKTIASTLVAGIYCAENEFSER..VVFVYVSRVEFTS   | 111 | NP_601977         | EFFAERSEG..IGFSAGTILAVFSWKFYAGTHILVVI     | 313 |
| Consensus         | gfp k ei yl y felp i tev sv              |     | Consensus         | i lk rv a enei fkdgs l vd i               |     |
| Est2L Czco domain | AN...ACWHTICADGCFRFAPIIISATGCLSRPAHLEIFG | 161 | Est2L Czco domain | IYATGEPANTEFISF.MRITGFDGLINCAWCCGAPAYIGI  | 385 |
| O07085            | N.....YFLIKTNREYQIKNLVIAATGFFHTENISISK   | 138 | O07085            | IWATGERNFICWIN...IKGVLICGRIIHHRGVSFVEGL   | 312 |
| NP_244544         | NG.....REHLKTINGWIEPKVVIATGAFCKEYILFVID  | 141 | NP_244544         | IWATGGSFSYEWIL...IDGVIAINGWFIHNRGITNIPGL  | 315 |
| NP_355926         | TIGETVVVVEFAGKEVVLRFKQLVIAIGMSGFANVKKFG  | 313 | NP_355926         | VYATGYSGMNGAPAILISREVAIKVKGWGLSITTLKFG    | 545 |
| NP_390541         | N.....YFLIKTNREYQIKNLVIAATGFFHTENISISK   | 138 | NP_390541         | IWATGERNFICWIN...IKGVLICGRIIHHRGVSFVEGL   | 312 |
| NP_601977         | ELFS.SFLRVSSIDGREWITFMVLNATGWTNIFYVYIFG  | 150 | NP_601977         | FWATGEPALRHAEMKIRGCGRIELICEVSEASLAR.V     | 352 |
| Consensus         | n f kt e tk lviatg f pn p ipg            |     | Consensus         | iwatgfr l wi i gv d g iih rg s ql         |     |
| Est2L Czco domain | MASEFGRIHSAFMDHEYFIAGKFAVHTETAPICQEVFE   | 201 | Est2L Czco domain | SVHGFNFNFMLYGFNTINIGHNSIIHMLSCISHVMARQA   | 425 |
| O07085            | LISEININLSSCYKNSKCIAYGNVWVGGSNSACIAYE    | 178 | O07085            | YFICGLF...WCHKRGSAILCGVG.....NLAEYIVKMN   | 343 |
| NP_244544         | SANNMSQVSSAYRNACIFGKSVWVGGSNSACIAYE      | 181 | NP_244544         | YFICGLF...WQYCRGSAILCGVG.....RLAEYIVFEIK  | 346 |
| NP_355926         | QIVFEGECSSCHFGFLAYAGKRVWVGGSNSAHLICPA    | 353 | NP_355926         | FWEGECRNMRKFTICAIWFHGGNLHCSRHSYCYLSICIK   | 585 |
| NP_390541         | LISEININLSSCYKNSKCIAYGNVWVGGSNSACIAYE    | 178 | NP_390541         | YFICGLF...WCHKRGSAILCGVG.....NLAEYIVKMN   | 343 |
| NP_601977         | IKKFKKGLITVNYRFAELFKGRKRVWVGGSNSAVCEILE  | 190 | NP_601977         | ILVYVG..STASTVQATFAGRVAG....RVAAKRLIVVS   | 386 |
| Consensus         | sf g qlhsscy n qlagk vlvvggnsaaaiave     |     | Consensus         | yf glp wq rgsal gvg daeylv q              |     |
| Est2L Czco domain | VARQVAELKVFQSFAYIME.....FPIRFYSA         | 229 | Est2L Czco domain | IVESLASHVEVEICR...                        | 440 |
| O07085            | ISKEFVTYLACSNK.....                      | 192 | O07085            | .GE.....                                  | 345 |
| NP_244544         | IAKEFNVMIAISEF.....                      | 195 | NP_244544         | HGCK.....                                 | 350 |
| NP_355926         | IWEACALVIMLCFSSTHIVFSISIMEIGLGLYSEFAYAN  | 393 | NP_355926         | ARCAGLKTFVYGLCKEHHL                       | 604 |
| NP_390541         | ISKEFVTYLACSNK.....                      | 192 | NP_390541         | .GE.....                                  | 345 |
| NP_601977         | LEGIAETIWAIFEFN.....                     | 206 | NP_601977         | FHVN.....                                 | 390 |
| Consensus         | l ker t a sr                             |     | Consensus         | g                                         |     |

(a)

|              |                                           |     |
|--------------|-------------------------------------------|-----|
| Est2L        | HCRFQLGICRRRLATSVWSGCKSWYVDERGHNSTNWPFTW  | 480 |
| PHS53692     | LLTFSSAFFILVVSMTFSASTSGASTHNEDTASASKCKAD  | 42  |
| WP_082823965 | TLRFIFSFILVVSMTFSSTSEASAHNTDTAKT.....     | 38  |
| AVF72281     | .....                                     | 0   |
| AKG92633     | .....                                     | 0   |
| Consensus    |                                           |     |
| Est2L        | SYRWLARYAGLAAYRLSSPLDTCSPACEGCRIAAFRDWLE  | 520 |
| PHS53692     | TVKISNESPLTFPAKTLPLPSASSDELKSAISCYPMPSVD  | 82  |
| WP_082823965 | ...TTEPLLTVPTKMVPLPSAASDELKSAISEYPMPSVD   | 74  |
| AVF72281     | .....MASFELD                              | 7   |
| AKG92633     | .....MCRFN                                | 5   |
| Consensus    |                                           |     |
| Est2L        | RANAFLRVFLRVSRALIGFPFALASCRKIVDLLSWLMP    | 560 |
| PHS53692     | EVINNTFQSIQCWRELICIRNADCKKKIKEMRKCFDVEDS  | 122 |
| WP_082823965 | EIINNTFQSVQCWRELICRNGDCCKKKIKNMKCFDVEDS   | 114 |
| AVF72281     | TVF...CMIKWGENFGTIEDNRLAYEKLVEPLPWVDD     | 43  |
| AKG92633     | CKLA..WMPFRIRNRVTFRVIQALLRSSCMVAGNKLLKH   | 43  |
| Consensus    |                                           |     |
| Est2L        | GCLGVNRRSMCLDGLSLQIVFGTRAPKGVILYLHGGAFG   | 600 |
| PHS53692     | ...LEKINGVPVRRLLTPKTIAREFN..KVFIDVHGGAYV  | 157 |
| WP_082823965 | ...LEKINGVTVRRLLTPKTIAREFN..KVFIDVHGGAYV  | 149 |
| AVF72281     | ...VKTERVAGSAPAEWIIASGAEDG..PILLYLHGGGYV  | 79  |
| AKG92633     | ...GLCAESRRVGSVFVRIRIRKGAAG..GVVLDIHGGGWV | 79  |
| Consensus    | p hgg                                     |     |
| Est2L        | LGSFRSHYSVTSRLARDSGCANWVFDYSLATEHYFAALE   | 640 |
| PHS53692     | FFAGLPSIEESLLIAHRVGITVISIDYRMPPHAFPAALN   | 197 |
| WP_082823965 | FFAGLPSIEESLLIAHRVGITVISIDYRMPPHAFPAALN   | 189 |
| AVF72281     | MGSMTTRHVMIAHISRAAGARVLGLDYRLATEFVFPAQVE  | 119 |
| AKG92633     | IGNACMNDLNVAMVNACEVAVSVVDYRLAVNTVEGILE    | 119 |
| Consensus    | v dy                                      |     |
| Est2L        | GCLACDAIRACLC..PADKLLRAGISAGGNVLAALALM    | 678 |
| PHS53692     | DVVSIVYSSVAEH...GACNLFEGGHSAGAGVLSAVCQL   | 234 |
| WP_082823965 | DVVSIVYSSVAEH...DAHNLFEGGHSAGAGVLSAVCQL   | 226 |
| AVF72281     | DAVAAIRWLLIANGS..DPKFIIVGGHSAGGGMVATLVAM  | 157 |
| AKG92633     | DCLATARWLLDCEEFAGLPVIVVGSAGGHAATLLAM      | 159 |
| Consensus    | d a g sag l l                             |     |
| Est2L        | KEPENGIAAGIMLLSPVTEPDLGGASMCSPCEATPMIR..  | 716 |
| PHS53692     | IADKQFLPAAYVAGTFWADLTKEGDTLYTNEGVRILVTY   | 274 |
| WP_082823965 | IETKQSLPLAVYAGTFWADLTKEGDTLYTNEGIRILLTY   | 266 |
| AVF72281     | RYLGEPMPAAGVGLSVWVMEGIGETFITNAEVTIMVC..   | 195 |
| AKG92633     | KCSPELLARVSGAVLYYGVYDLTGCTFSVTRTAGRTLLDG  | 199 |
| Consensus    | g                                         |     |
| Est2L        | RDWLECALRAYA...APVCALSHRPLEADLRGIPPMIIQ   | 752 |
| PHS53692     | CGFLEAAANLYAGS..ESLTHSSISPLYGNFEGFPPTFLI  | 312 |
| WP_082823965 | CGFLAASAKLYAGS..ESLTHPSISSLYGNFEGFPPTLLV  | 304 |
| AVF72281     | KDLILCIAGVYLG...KDPRAPIASPIHADLRGIPPELLQ  | 233 |
| AKG92633     | PGMVEALRLITPLSDECCRCPFLISPLYGLDLGIPFALMF  | 239 |
| Consensus    | g PP                                      |     |
| Est2L        | VGDCELLLPSSTRLAERARQSCACGLEIHCGRWVFCLO    | 792 |
| PHS53692     | SGTREMFLDITVRVNRKLRDAGVTCLEVFEGLSHADYVV   | 352 |
| WP_082823965 | SGTREMFLDITVRVNRKLRNANVTCLEVFEGLSHADYVV   | 344 |
| AVF72281     | VGSIEITLLPSNCLARLAKADQEVKVEVWDEMHWVFCDF   | 273 |
| AKG92633     | VSELDFIPDITLCMAERNWAGSDVFLLPAAHGFIHFPTAM  | 279 |
| Consensus    | g l d v h                                 |     |
| Est2L        | AFYLRARNALLGLARFARQCLETAGCTFCAADSFRTTCP   | 832 |
| PHS53692     | AYETPESHVYQELKCFLLSVCTKSSD.....           | 379 |
| WP_082823965 | AYETPESLSVYQELKCFLLSVSTNSFD.....          | 371 |
| AVF72281     | APILPEALCAIDGIGEFIKKHTG.....              | 296 |
| AKG92633     | S.....GRVLAISREWITGRLSVG.....             | 299 |
| Consensus    |                                           |     |
| Est2L        | ATDFQP                                    | 838 |
| PHS53692     | .....                                     | 379 |
| WP_082823965 | .....                                     | 371 |
| AVF72281     | .....                                     | 296 |
| AKG92633     | .....                                     | 299 |
| Consensus    |                                           |     |

(b)



|           |                                           |             |     |
|-----------|-------------------------------------------|-------------|-----|
| ABL95965  | ..MENNTFVSFLKVLLLGTIVFYISTHLS             | TSRIVEYVS.. | 36  |
| AAC21862  | .....MIFIFISLFAKIFFNNDFFTN                | SHVKIMAK..  | 30  |
| CAA37863  | MLLKRLGLAALFSLSMVGCTTAPNTLAVNTTCKRIICYERS |             | 40  |
| CAA47949  | MLLKRLCFAALFSLSMVGCTNAPNALAVNTTCKRIICYERN |             | 40  |
| AAC67392  | .MNRDAIKILGAGAIAGALATRIPLSISCTPPCINYS..   |             | 37  |
| Est4L     | .....                                     |             | 0   |
| Consensus |                                           |             |     |
| ABL95965  | .....QDAKKLTIEGICVAYREYKGNFTETIVFLMGFAG   |             | 70  |
| AAC21862  | .....SLLNYCFHQVKQTIN.TPVLIFIHGLFG         |             | 57  |
| CAA37863  | KSDLEVKSLTLASGDKMVYAENDNVTG..EPILLINGFGG  |             | 78  |
| CAA47949  | KSDLEIKSLTLASGDKMVYAENGNAV..EPILLINGFGG   |             | 78  |
| AAC67392  | ..NLVPKEFGWAFVNNIHIYYEYIGSG..EPLIMINGVLG  |             | 73  |
| Est4L     | .....MAYFEMEGOTLHYEYVHG..APLILIHGLGS      |             | 30  |
| Consensus |                                           | g           |     |
| ABL95965  | SSYDNKVLIDV.LSENVHCIAFGIPFFELSEKKNDFDYSD  |             | 109 |
| AAC21862  | DMDNLGVIAARA.FSEHNSILRIIDLNNHCHSFHS..EKMN |             | 94  |
| CAA37863  | NKDNFTRIADK..LEGYHLIIBCLLGFENSSKPMADYRA   |             | 116 |
| CAA47949  | NKDNFTRIARQ..LEGYHLIIBCLLGFENSSKPMADYRS   |             | 116 |
| AAC67392  | NLESWGPPIIINGLASCHVEIINDNRGTGSGTVGQDFLMD  |             | 113 |
| Est4L     | SCLEWELCVPV.LSGHYRLVVVVRGHERSDKP.RERYSI   |             | 68  |
| Consensus |                                           | y d g s     |     |
| ABL95965  | ESIVRLILKSLDSLGIE.....CFTLVGSHMGGYLSLAI   |             | 143 |
| AAC21862  | CLMAEDVIAVIRHNLIS.....KVILGHSMGGKTAMKI    |             | 128 |
| CAA37863  | DACATRLHELMCAKGLA.....SNTHVCGNSMGGCAISVAY |             | 151 |
| CAA47949  | EAQTRLHELMCAKGLA.....SNTHVCGNSMGGCAISVAY  |             | 151 |
| AAC67392  | ALTYTIPLYASDTIGLLNYLGYSNLNVIGWSMGGFVACCI  |             | 153 |
| Est4L     | AGFTADLVALIEHLCIP.....PAHVVGLSMGGMIAFCL   |             | 102 |
| Consensus |                                           | g smgg      |     |
| ABL95965  | *SIISRRVERPILFPAAYDVNSEDLQNPFPFLKDEHLL    |             | 183 |
| AAC21862  | TALCHELVERPILVIEMSE.....MPYEGFGHKDVFNGLF  |             | 162 |
| CAA37863  | AAKSEKEIKSNWLVTAG.....FWSAGVFKSLEGATL     |             | 184 |
| CAA47949  | AAKSEKEIKSNWLVTAG.....FWSAGVFKSLEGATL     |             | 184 |
| AAC67392  | AIDNPSYVNRVLLCTAFNI...YLPPFKVSPCSIITGFT   |             | 190 |
| Est4L     | AVDBEQMLKSNLIVNSAF.....QVKVRSASDYWCWAK    |             | 135 |
| Consensus |                                           | p l         |     |
| ABL95965  | KFYCIFLDVGLKTYPLFKFVYRNSLAEGEILNAEHFDYLF  |             | 223 |
| AAC21862  | AVRNAKFPENRQCAKFIKQEIN.DEDVVCFMLRSFDVNSA  |             | 201 |
| CAA37863  | ENNPLLINSKEDFYMYDFVMYKPPYIPKSVKAVFACERI   |             | 224 |
| CAA47949  | ENNPLLINSKEDFYMYDFVMYKPPYIPKSVKAVFACERI   |             | 224 |
| AAC67392  | ASDFTVTVETIIPYLVPDNLQAHFDVAKYVLTLEKYFI    |             | 230 |
| Est4L     | RWSLARILSLNTIGKALGSLFPKPECAELRRKMAERWAK   |             | 175 |
| Consensus |                                           |             |     |
| ABL95965  | SCNYFLPAEILIKFTKDKAAKFLKIDLEGITARTLIYIG   |             | 263 |
| AAC21862  | DCFRFNLTALENNYANIMDEK.....VRVFTETIFIKG    |             | 235 |
| CAA37863  | NN.KALDTFILEQIVTENVEER..AKIIAKYNIITLVVWG  |             | 261 |
| CAA47949  | NN.KALDAKILEQIVTENVEER..AKIIAQYKISTLVVWG  |             | 261 |
| AAC67392  | S....YTSVLKCTNALATFNS..VGQLCNITARTIVVGG   |             | 263 |
| Est4L     | N....DKRAYLASFEAIVGWGV..CECLSKISCTIVVISA  |             | 209 |
| Consensus |                                           | t1          |     |
| ABL95965  | *EKQCITPFSIGEYLSKSIKSKFMLIP.NEGEMPLSN..R  |             | 300 |
| AAC21862  | GNSSYIKIENSEKILECFENATAFTIN.GSGHWVHAKEPD  |             | 274 |
| CAA37863  | DRDQVIKPETTTELKELIPQACQVIMN.DVGEVPMVEAVK  |             | 300 |
| CAA47949  | DRDQIKPEETVNLIKKIIPQACQVIMME.DVGEVPMVEALD |             | 300 |
| AAC67392  | DSDLLPFCNSQYLAENINAGLYIFSPDAGEGLIYCYFT    |             | 303 |
| Est4L     | DHDYTPVACK.EIIVKLLDARLVVIE.DSPKATPLDQFE   |             | 247 |
| Consensus |                                           | h           |     |
| ABL95965  | LVIELVRNFLIDILE....                       |             | 315 |
| AAC21862  | FVIRAIKRFNLNKN.....                       |             | 287 |
| CAA37863  | DTANDYKAFRDGLKK....                       |             | 315 |
| CAA47949  | ETADNYKAFRSILEACR..                       |             | 317 |
| AAC67392  | CFINLVTSFLG.....                          |             | 314 |
| Est4L     | RFNNZLLDELKTVEETTQD                       |             | 266 |
| Consensus |                                           | f           |     |

(c)

**Figure S2.** Multiple sequence alignments of a CzCO domain of Est2L (a), an acetyltransferase domain of Est2L (b), and Est4L (c) using the Clustal W method in DNA/MAN. Completely and highly conserved sequence(s) in the alignments are shown in black and pink boxes, respectively. Marks with star represent catalytic residues.

## References for MSA sequences(Figure S2)

(Figure S2.a)

**O07085:** Sturr, M.; G.; Ablooglu, A.; J.; Krulwich, T.; A. A *Bacillus subtilis* locus encoding several gene products affecting transport of cations. *Gene*, **1997**, 188(1), 91–94.

**NP\_244544:** Nakasone K.; Masui N.; Takaki Y.; Sasaki R.; Maeno G.; Sakiyama T.; Hiramata C.; Fuji F.; Takami H. Characterization and comparative study of the *rrn* operons of alkaliphilic *Bacillus halodurans* C-125. *Extremophiles*, **2000**, 4(4), 209-214.

**NP\_355926:** Wood D.W.; Setubal J.C.; Kaul R.; Monks D.E.; Kitajima J.P.; Okura V.K.; Zhou Y.; Chen L.; Wood G.E.; Almeida N.F.; Jr. Woo L.; Chen Y.; Paulsen I.T.; Eisen J.A.; Karp P.D.; Bovee D. Sr.; Chapman P.; Clendenning J.; Deatherage G.; Gillet W.; Grant C.; Kuttyavin T.; Levy R.; Li M.J.; McClelland E.; Palmieri A.; Raymond C.; Rouse G.; Saenphimmachak C.; Wu Z.; Romero P.; Gordon D.; Zhang S.; Yoo H.; Tao Y.; Biddle P.; Jung M.; Krespan W.; Perry M.; Gordon-Kamm B.; Liao L.; Kim S.; Hendrick C.; Zhao Z.Y.; Dolan M.; Chumley F.; Tingey S.V.; Tomb J.F.; Gordon M.P.; Olson M.V.; Nester E.W. The genome of the natural genetic engineer *Agrobacterium tumefaciens* C58. *Science*. **2001**, 14;294(5550), 2317-2323.

**NP\_390541:** Borriss R.; Danchin A.; Harwood C. R.; Médigue C.; Rocha E.; Sekowska A.; Vallenet D. *Bacillus subtilis*, the model Gram-positive bacterium: 20 years of annotation refinement. *Microb. Biotechnol.* **2018**, 11(1), 3–17.

**NP\_601977:** Silberbach M.; Schäfer M.; Hüser A. T.; Kalinowski J.; Pühler A.; Krämer R.; Burkovski A. Adaptation of *Corynebacterium glutamicum* to ammonium limitation: a global analysis using transcriptome and proteome techniques. *Appl. Environ. Microbiol.*, **2005**, 71(5), 2391–2402.

(Figure S2.b)

**PHS53692:** Won S. J.; Jeong H. B.; Kim H. K. Characterization of novel salt-tolerant esterase isolated from the marine bacterium *Alteromonas* sp. 39-G1. *J. Microbiol. Biotechnol.* **2020**, 30(2), 216–225

**WP\_082823965:** No available reference(article).

**AVP72281:** Borchert E.; Selvin J.; Kiran S.G.; Jackson S.A.; O’Gara F.; Dobson A.D.W. A novel cold active esterase from a deep sea sponge *Stelletta normani* metagenomic library. *Front. Mar. Sci.* **2017**, 4, 287.

**AKG92633:** Kim H.J.; Jeong Y.S.; Jung W.K.; Kim S.K.; Lee H.W.; Kahng H.Y.; Kim J.; Kim H. Characterization of novel family IV esterase and family I.3 lipase from an oil-polluted mud flat metagenome. *Mol Biotechnol.* **2015** 57(9),781-792.

(Figure S2.c)

**ABL95965:** Cai J.; Xie Y.; Song B.; Wang Y.; Zhang Z.; Feng Y. *Fervidobacterium changbaicum* Lip1: identification, cloning, and characterization of the thermophilic lipase as a new member of bacterial lipase family V. *Appl. Microbiol. Biotechnol.* **2011**, 89(5), 1463-1473.

**AAC21862:** Tatusov R.L.; Mushegian A.R.; Bork P.; Brown N.P.; Hayes W.S.; Borodovsky M.; Rudd K.E.; Koonin E.V. Metabolism and evolution of *Haemophilus influenzae* deduced from a whole-genome comparison with *Escherichia coli*. *Curr. Biol.* **1996**, 6(3), 279-291.

**CAA37863:** Feller G.; Thiry M.; Gerday C. Nucleotide sequence of the lipase gene *lip3* from the antarctic psychrotroph *Moraxella* TA144. *Biochim. Biophys. Acta.* **1991**, 1088(2), 323-324.

**CAA47949:** Arpigny J.L.; Feller G.; Gerday C. Cloning, sequence and structural features of a lipase from the antarctic facultative psychrophile *Psychrobacter immobilis* B10. *Biochim Biophys Acta.* **1993**, 1171(3), 331-333.

**AAC67392:** Arpigny J.L.; Jendrossek D.; Jaeger K.E. A novel heat-stable lipolytic enzyme from *Sulfolobus acidocaldarius* DSM 639 displaying similarity to polyhydroxyalkanoate depolymerases. *FEMS. Microbiol. Lett.* **1998**, 167(1):69-73.
